# Supplementary material for: Compression and deposition of microgel monolayers from fluid interfaces: particle size effects on interface microstructure and nanolithography
Source: Royal Society of Chemistry journal article supplement (doi:10.1039/c6cp07896f), 2017-01-01
Supplement: c6cp07896f1.pdf [file c6cp07896f1.pdf]

## Electronic Supplementary Information for

# Compression and deposition of microgel monolayers from fluid interfaces: particle size effects on interface microstructure and nanolithography<sup>†</sup>

Laura Scheidegger,<sup>a</sup> Miguel Ángel Fernández-Rodríguez,<sup>a</sup> Karen Geisel,<sup>b</sup> Michele Zanini,<sup>a</sup> Roey Elnathan,<sup>c</sup> Walter Richtering,<sup>b</sup> and Lucio Isa<sup>a\*</sup>

DOI: 10.1039/C6CP07896F

<sup>a</sup> *Laboratory for Interfaces, Soft matter and Assembly, Department of Materials, ETH Zurich, Vladimir-Prelog-Weg 5, 8093 Zurich, Switzerland; E-mail: lucio.isa@mat.ethz.ch*

<sup>b</sup> *Institute of Physical Chemistry, RWTH Aachen University, Landoltweg 2, 52056 Aachen, Germany.*

<sup>c</sup> *ARC Centre of Excellence in Convergent Bio-Nano Science and Technology, Future Industries Institute, University of South Australia, Mawson Lakes, 5095, Australia.*

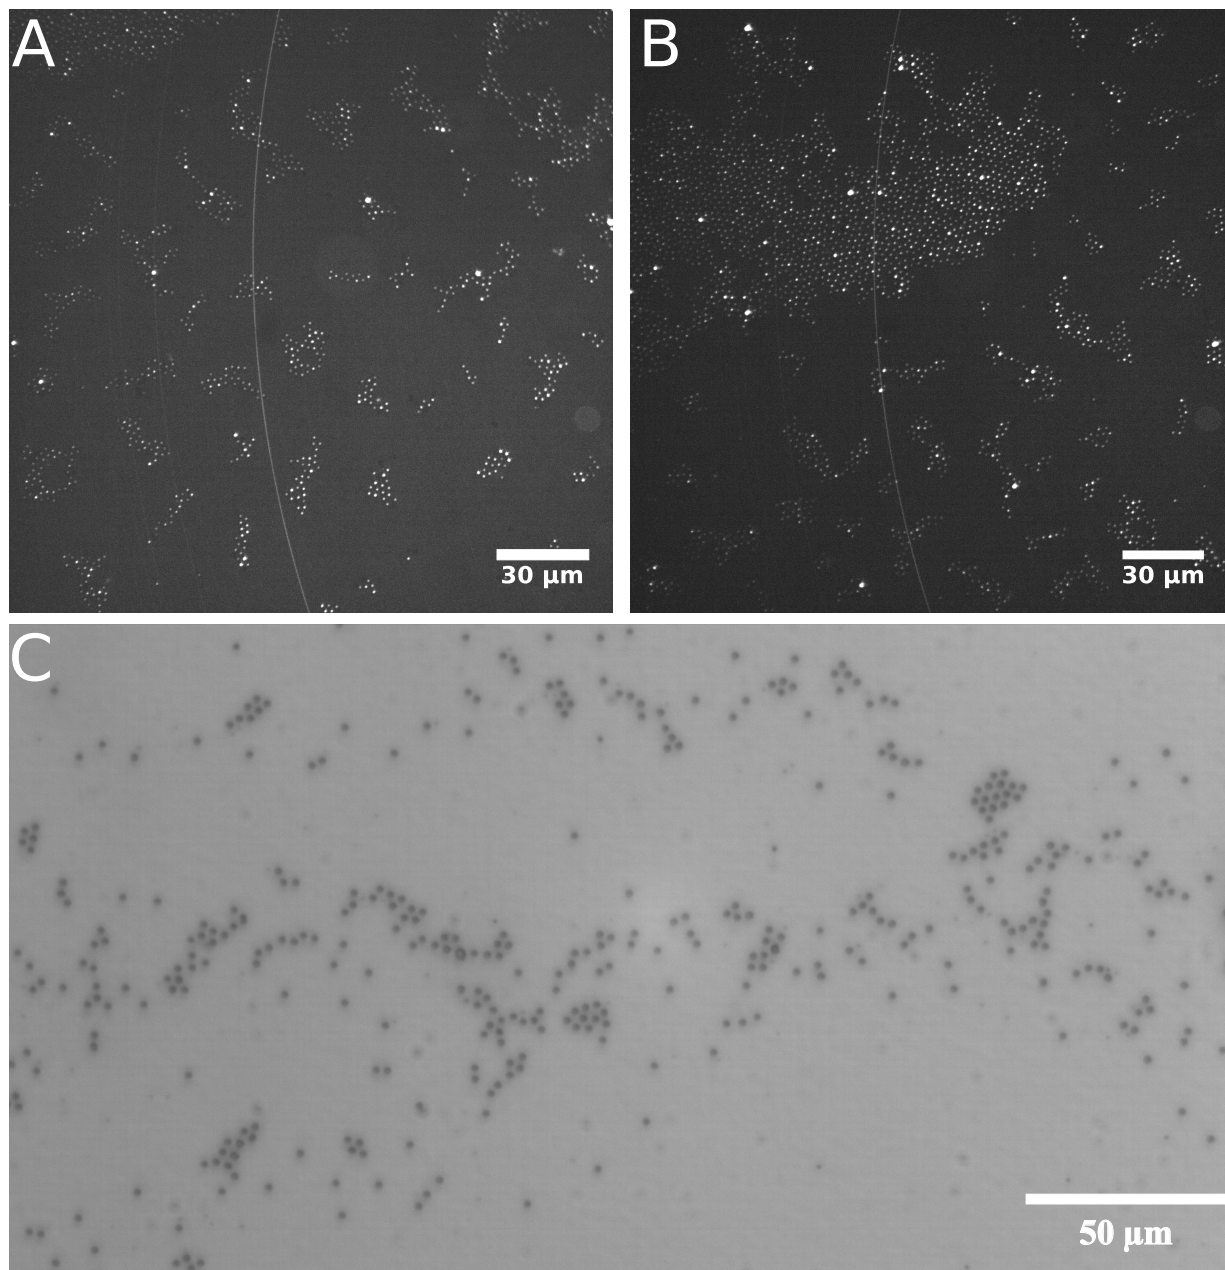

**Fig. S1.** A-B. Fluorescent confocal images of the Big microgels adsorbed at water/hexadecane interfaces. C. Optical microscope image of the Big microgels deposited at a silicon substrate at very low surface pressure.

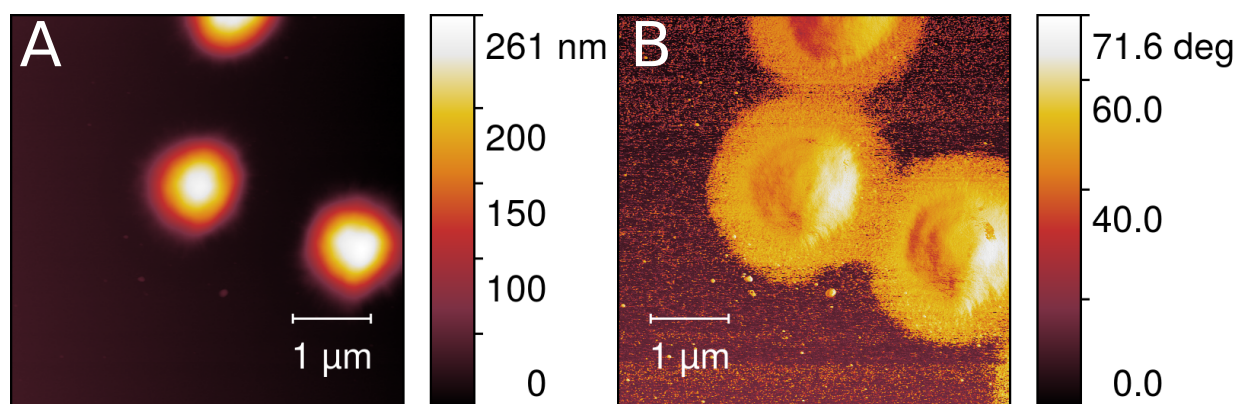

**Fig. S2.** **A)** Height and **B)** Phase AFM image of Big microgels at a very low surface pressure where it can be seen that the very flat shells are in contact.
